# Supplementary material for: Coupling pentlandite nanoparticles and dual-doped carbon networks to yield efficient and stable electrocatalysts for acid water oxidation
Source: Royal Society of Chemistry journal article supplement (doi:10.1039/c8ta09534e), 2018-11-23
Supplement: c8ta09534e1.pdf [file c8ta09534e1.pdf]

## *Supporting Information*

### **Coupling pentlandite nanoparticles and dual-doped carbon networks to yield efficient and stable electrocatalysts for acid water oxidation**

Qi Hu, Guodong Li, Xiufang Liu, Bin Zhu, Guomin Li, Liangdong Fan, Xiaoyan Chai,

Qianling Zhang, Jianhong Liu and Chuanxin He\*

College of Chemistry and Environmental Engineering, Shenzhen University,

Shenzhen, Guangdong, 518060, People's Republic of China.

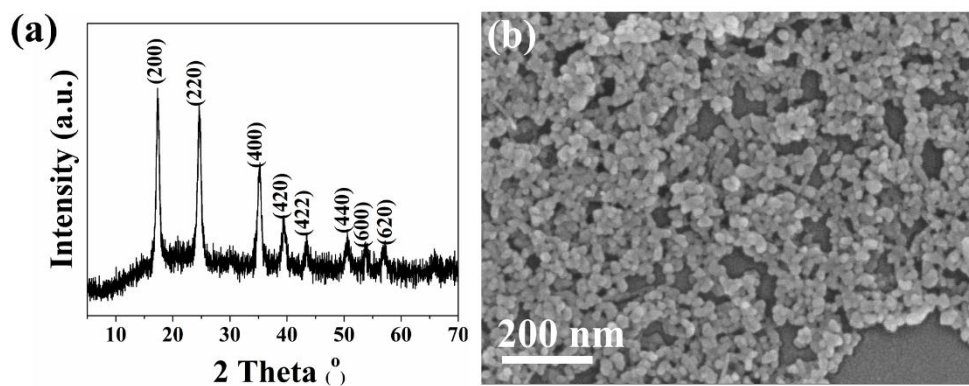

**Figure S1** (a) XRD pattern of binary NiFe-Prussian blue analogues (denoted NiFe-PBAs), (b) SEM image of NiFe-PBAs

The XRD pattern of NiFe-PBAs showed a set of diffraction peaks, corresponding to (200), (220), (400), (420), (422), (440), (660) and (620) planes for PBAs (JCPDS no. 20-0915) (Figure S1a), indicating the successful synthesis of PBAs.

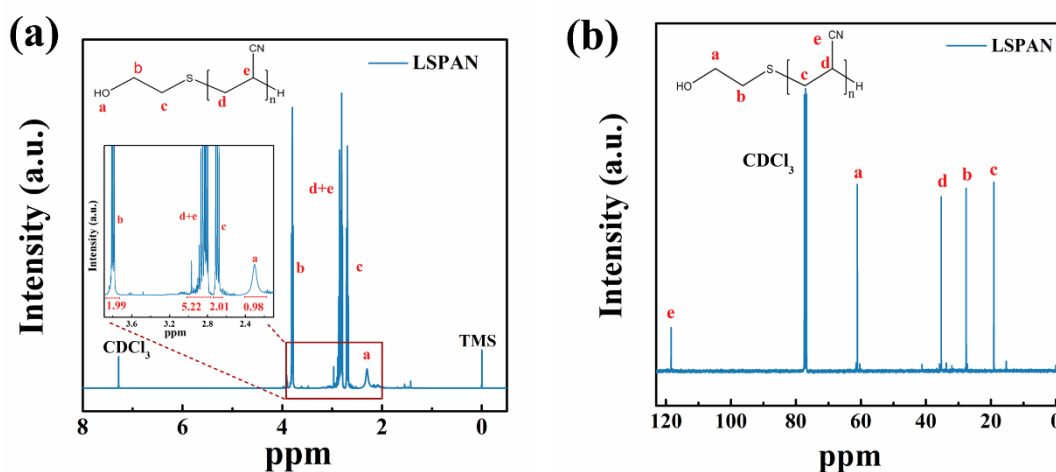

**Figure S2** (a)  $^1\text{H}$  and (b)  $^{13}\text{C}$  NMR spectra of liquid sulfur-modified-polyacrylonitrile (denoted LSPAN).

The molecular structure of as-synthesized LSPAN was investigated by NMR spectra. The  $^1\text{H}$  spectrum of LSPAN displayed a set of peaks, in well accordance with structure of LSPAN (Figure S2a). Based on the ration of different peaks, the degree of polymerization (DP) for LSPAN was calculated to be 1 and 2. In the case of  $^{13}\text{C}$  NMR spectrum for LSPAN, obvious peaks for  $\text{C}\equiv\text{N}$  carbons ( $\sim 120$  ppm) and C-H carbons (i.e. a, b, c and d peaks ranging from 20 to 60 ppm) can be found in Figure S2b, further confirming the successful synthesis of LSPAN with low DP (i.e. 1 and 2).

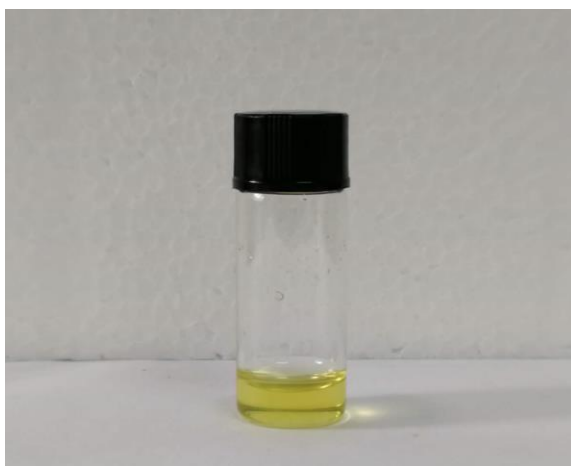

**Figure S3** Optical image of as-synthesized LSPAN with low DP (i.e. 1 and 2)

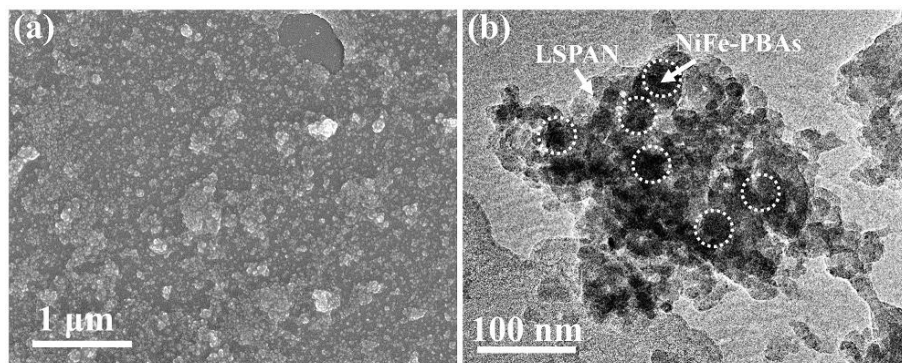

**Figure S4** (a) SEM and (b) TEM images of NiFe-PBAs/LSPAN hybrid precursors.

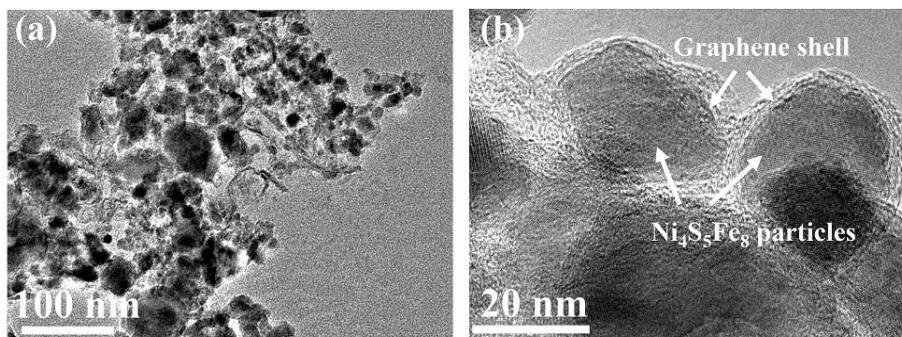

**Figure S5** (a) SEM and (b) TEM images of N, S-doped carbon network-immobilized large pentlandites (i.e. Ni<sub>4</sub>Fe<sub>5</sub>S<sub>8</sub>) nanoparticles (denoted NSC/Ni<sub>4</sub>Fe<sub>5</sub>S<sub>8</sub>-1000). The NSC/Ni<sub>4</sub>Fe<sub>5</sub>S<sub>8</sub>-1000 was synthesized through pyrolysis of NiFe-PBAs/LSPAN hybrid precursors at 1000 °C under argon atmosphere.

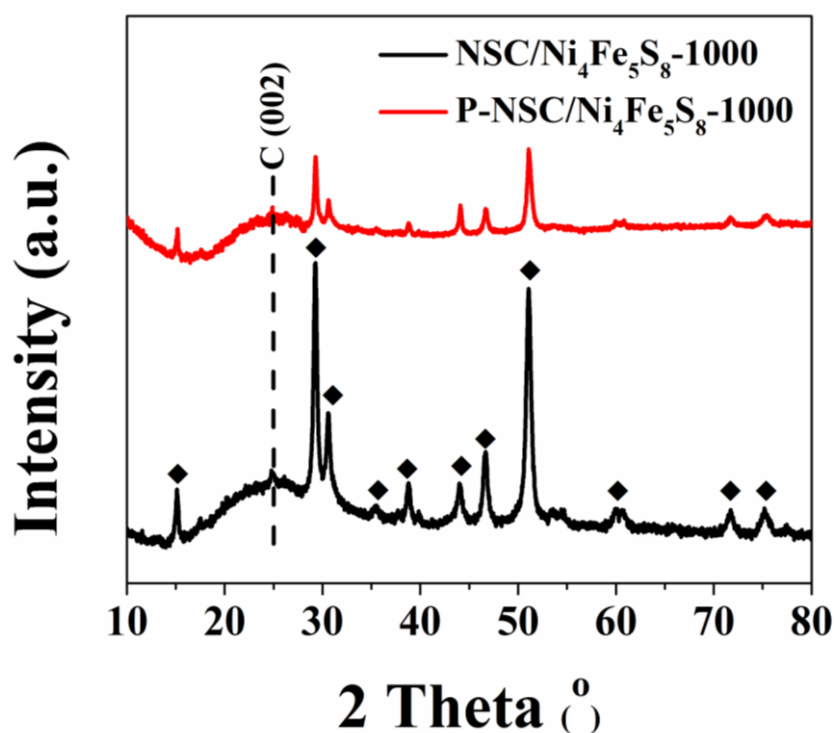

**Figure S6** XRD patterns of NSC/Ni<sub>4</sub>Fe<sub>5</sub>S<sub>8</sub>-1000 and P-NSC/Ni<sub>4</sub>Fe<sub>5</sub>S<sub>8</sub>-1000. The P-NSC/Ni<sub>4</sub>Fe<sub>5</sub>S<sub>8</sub>-1000 was synthesized by acid etching of NSC/Ni<sub>4</sub>Fe<sub>5</sub>S<sub>8</sub>-1000.

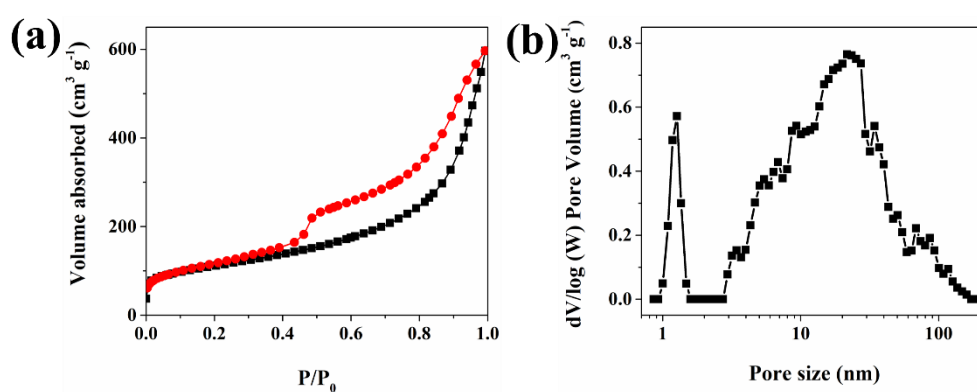

**Figure S7** (a) N<sub>2</sub> adsorption-desorption isotherms of P-NSC/Ni<sub>4</sub>Fe<sub>5</sub>S<sub>8</sub>-1000 (with porous structure) at 77 K, (b) corresponding pore distribution of P-NSC/Ni<sub>4</sub>Fe<sub>5</sub>S<sub>8</sub>-1000 determined by the method of density functional theory.

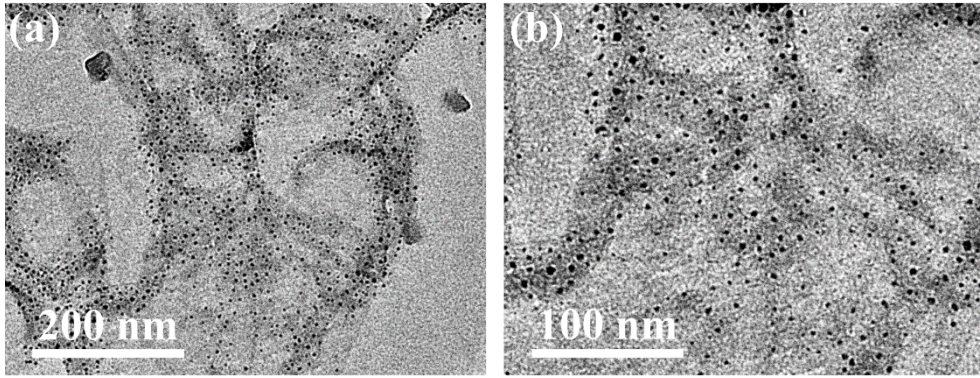

**Figure S8** TEM images of P-NSC/Ni<sub>4</sub>Fe<sub>5</sub>S<sub>8</sub>-1000 sample after further acid etching in 1 M H<sub>2</sub>SO<sub>4</sub> solution at 100 °C for 24 h.

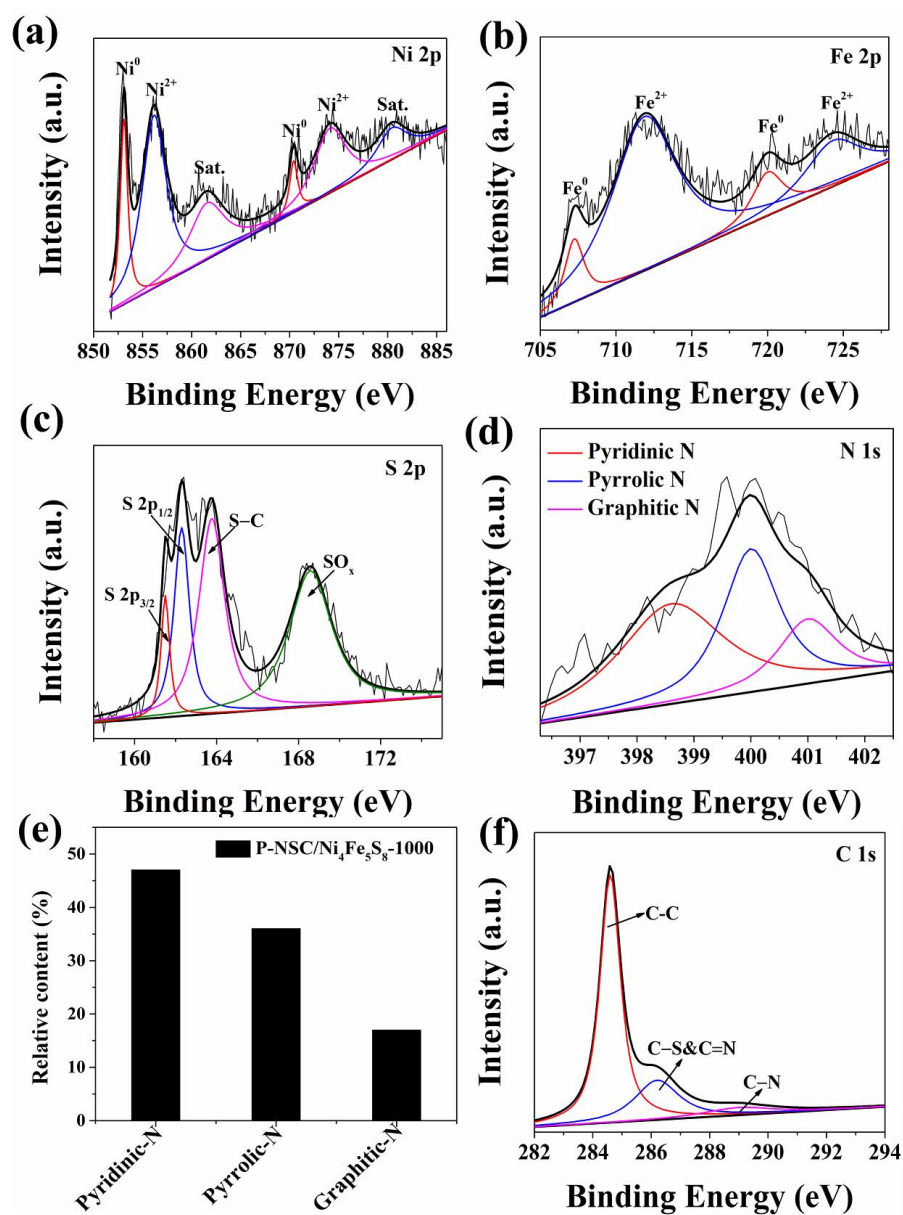

**Figure S9** XPS spectrum of (a) Ni 2p, (b) Fe 2p, (c) S 2p, (d) N 1s, (e) distribution of different N species (i.e. pyridinic-N, pyrrolic-N, and graphitic-N) based on (d), and (f) C 1s for P-NSC/Ni<sub>4</sub>Fe<sub>4</sub>S<sub>8</sub>-1000 (with porous structure).

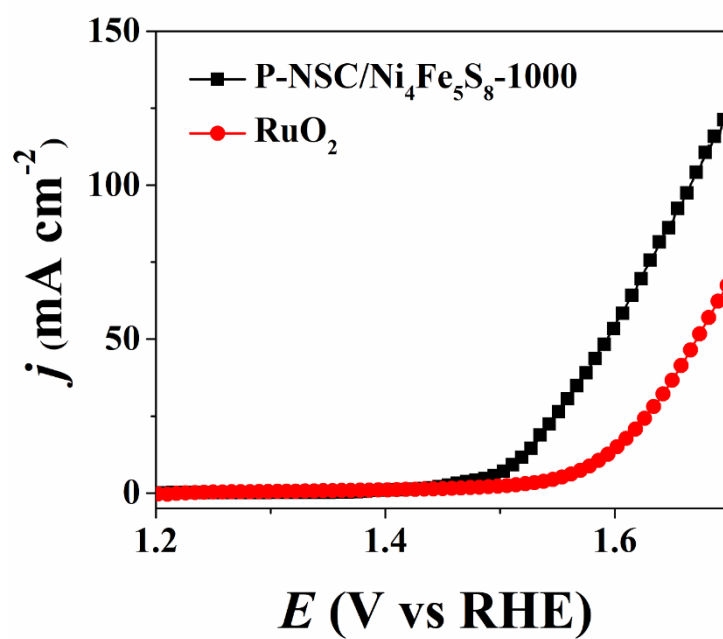

**Figure S10** Steady-state polarization curves of P-NSC/Ni<sub>4</sub>Fe<sub>5</sub>S<sub>8</sub>-1000 and commercial RuO<sub>2</sub> electrocatalysts for OER in 1 M KOH.



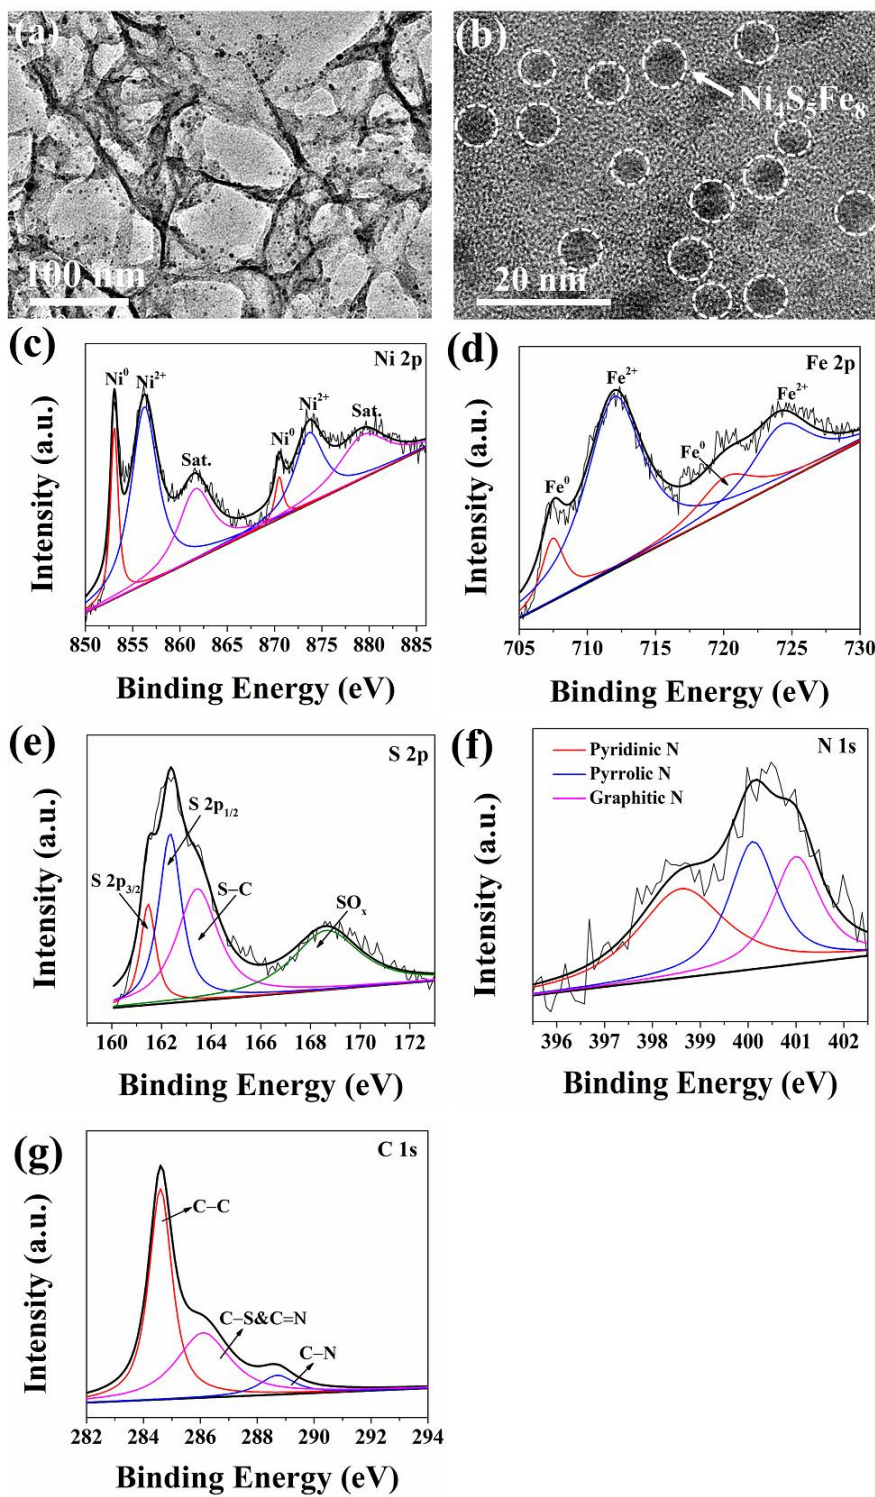

**Figure S11** (a) TEM and (b) HRTEM images of P-NSC/Ni<sub>4</sub>Fe<sub>4</sub>S<sub>8</sub>-1000 after 10000 times of potential cycles between 1.2 and 1.9 V (vs RHE). XPS spectra of (c) Ni 2p, (d) Fe 2p, (e) S 2p, (f) N 1s and (g) C 1s for P-NSC/Ni<sub>4</sub>Fe<sub>4</sub>S<sub>9</sub>-1000 after 10000 times of potential cycles.

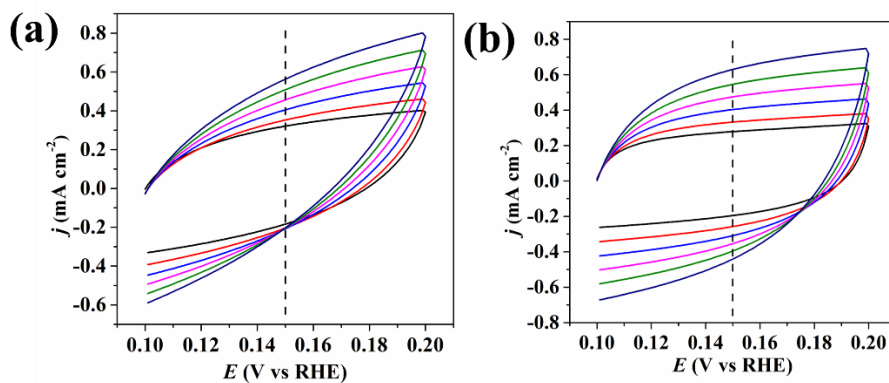

**Figure S12** CV curves for (a) NSC/Ni<sub>4</sub>Fe<sub>4</sub>S<sub>8</sub>-1000 (without porous structure) and (b) P-NSC/Ni<sub>4</sub>Fe<sub>4</sub>S<sub>8</sub>-1000 (with porous structure) at different rates (i.e. 0.04, 0.06, 0.08, 0.10, 0.12, and 0.14 V/s).

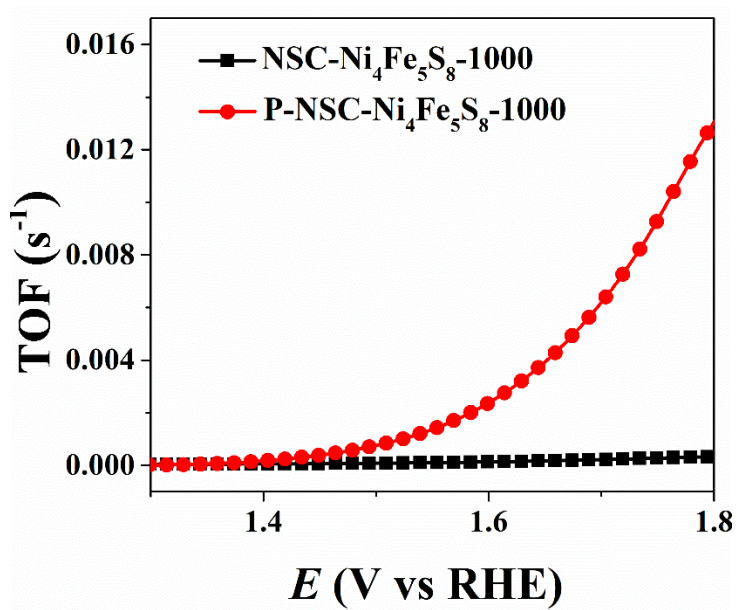

**Figure S13** Plots of TOF for NSC/Ni<sub>4</sub>Fe<sub>4</sub>S<sub>8</sub>-1000 and P-NSC/Ni<sub>4</sub>Fe<sub>4</sub>S<sub>8</sub>-1000 against different potentials.

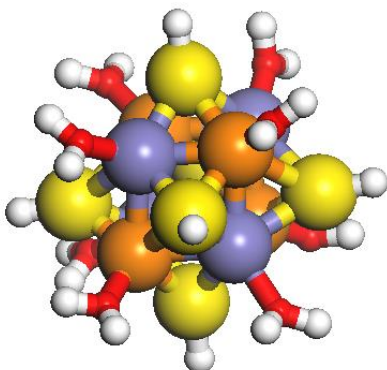

**Figure S14** Structure scheme of  $\text{H}_6\text{Fe}_4\text{Ni}_4\text{S}_6(\text{H}_2\text{O})_8^{2+}$  clusters determined by computational modeling. Lavender, orange, yellow, white, and red represent Fe, Ni, S, H, and O atoms, respectively.

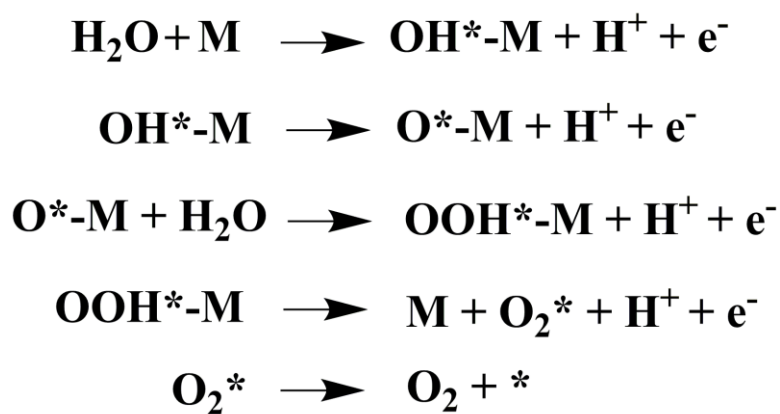

**Figure S15** Reaction process of OER in acid media.

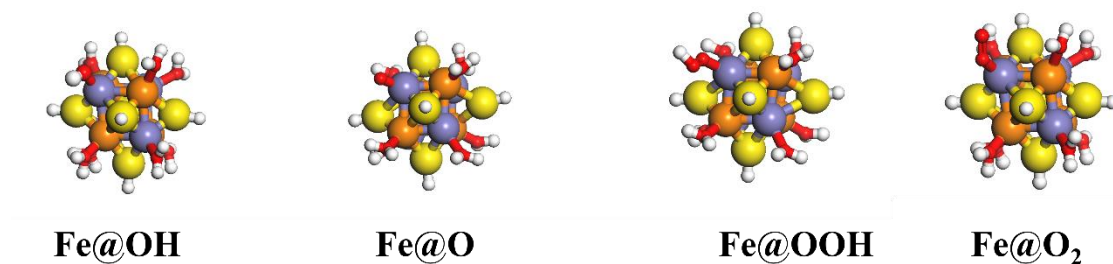

**Figure S16** Atomic configurations for OER intermediates on Fe sites of  $\text{H}_6\text{Fe}_4\text{Ni}_4\text{S}_6(\text{H}_2\text{O})_8^{2+}$  clusters. Lavender, orange, yellow, white, and red represent Fe, Ni, S, H, and O atoms, respectively.

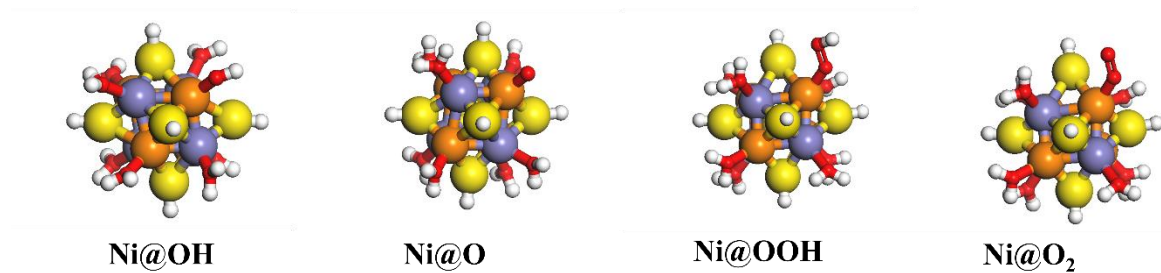

**Figure S17** Atomic configurations for OER intermediates on Ni sites of  $\text{H}_6\text{Fe}_4\text{Ni}_4\text{S}_6(\text{H}_2\text{O})_8^{2+}$  clusters. Lavender, orange, yellow, white, and red represent Fe, Ni, S, H, and O atoms, respectively.

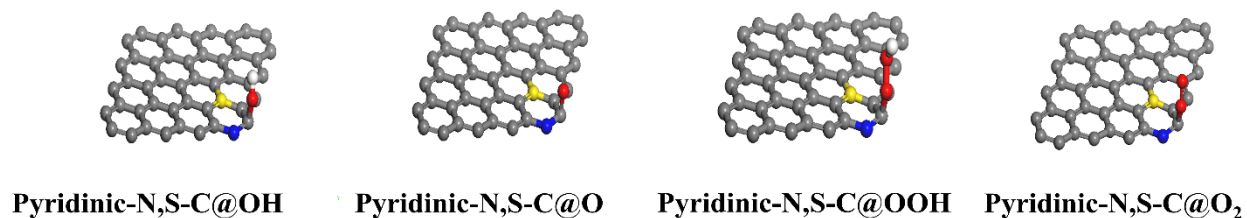

**Figure S18** Atomic configurations for OER intermediates on pyridinic-N, S doped carbon (denoted pyridinic-N, S-C). Black, yellow, blue, red, and white represent to C, S, N, O, and H atoms, respectively.

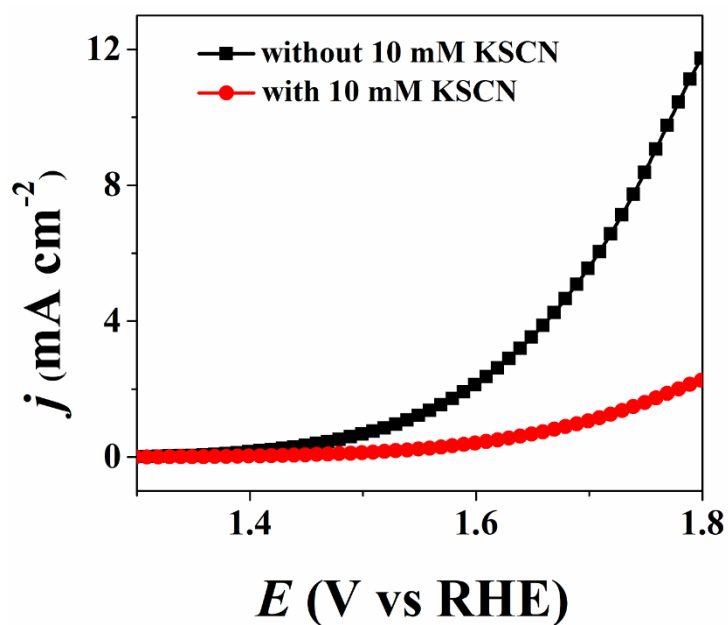

**Figure S19** Steady-state polarization curves of P-NSC/Ni<sub>4</sub>Fe<sub>5</sub>S<sub>8</sub>-1000 with and without addition of 0.01 M KSCN aqueous solution.

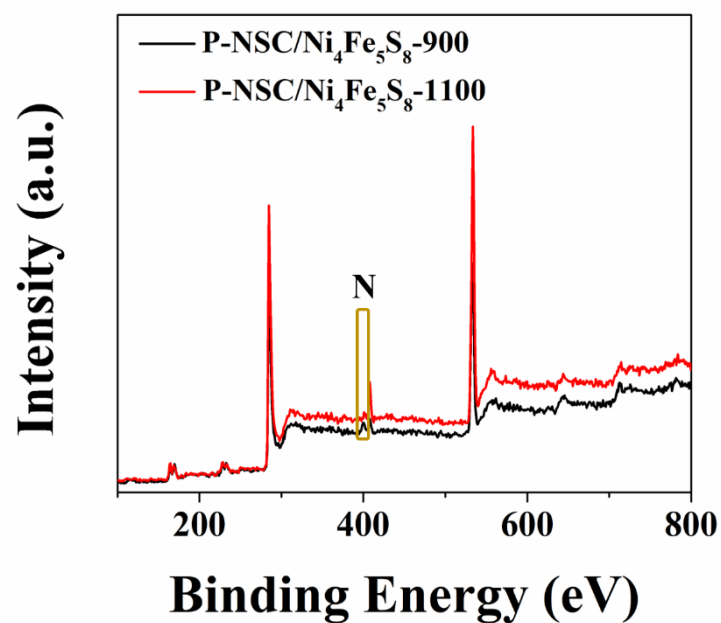

**Figure S20** XPS spectra of survey for P-NSC/Ni<sub>4</sub>Fe<sub>5</sub>S<sub>8</sub>-900 and P-NSC/Ni<sub>4</sub>Fe<sub>5</sub>S<sub>8</sub>-1100 samples (900 and 1100 refer to the pyrolysis temperature). Both samples were synthesized through same procedure as P-NSC/Ni<sub>4</sub>Fe<sub>5</sub>S<sub>8</sub> except that the pyrolysis temperature changed to 900 and 1100 °C, respectively.

**Table S1** Elemental compositions of P-NSC/Ni<sub>4</sub>Fe<sub>5</sub>S<sub>8</sub>-900 and P-NSC/Ni<sub>4</sub>Fe<sub>5</sub>S<sub>8</sub>-1100 catalysts determined by XPS

| Catalysts                                                      | C<br>(at%) | N<br>(at%) | Ni<br>(at%) | Fe<br>(at%) | S<br>(at%) | O<br>(at%) |
|----------------------------------------------------------------|------------|------------|-------------|-------------|------------|------------|
| P-NSC/Ni <sub>4</sub> Fe <sub>5</sub> S <sub>8</sub> -<br>900  | 64.05      | 2.67       | 2.43        | 1.19        | 5.00       | 24.66      |
| P-NSC/Ni <sub>4</sub> Fe <sub>5</sub> S <sub>8</sub> -<br>1100 | 64.83      | 1.08       | 1.55        | 1.31        | 3.58       | 27.65      |

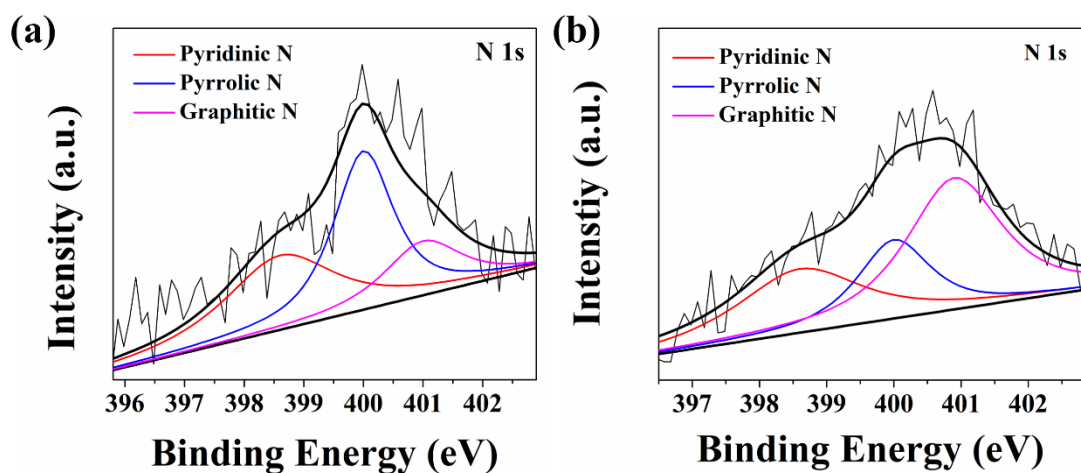

**Figure S21** XPS spectra of N 1s for (a) P-NSC/Ni<sub>4</sub>Fe<sub>5</sub>S<sub>8</sub>-900 and (b) P-NSC/Ni<sub>4</sub>Fe<sub>5</sub>S<sub>8</sub>-1100.

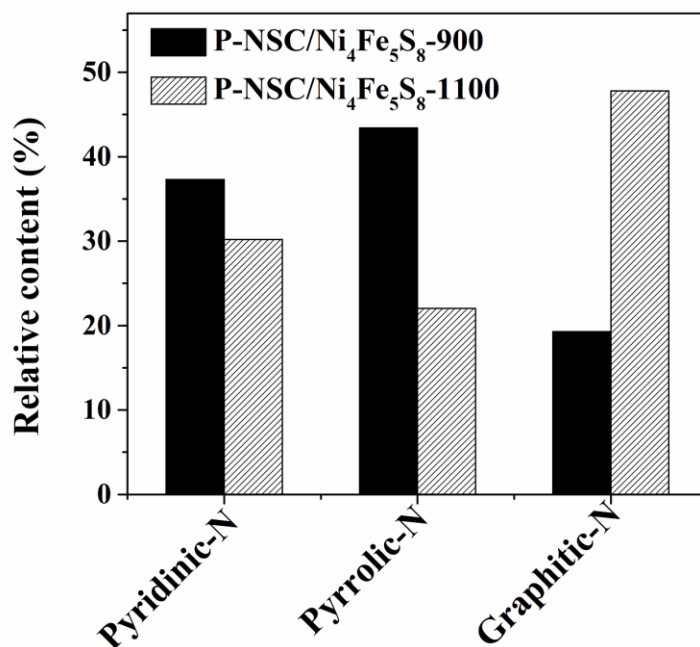

**Figure S22** Distribution of pyridinic-N, pyrrolic-N, and graphitic-N determined by XPS for P-NSC/Ni<sub>4</sub>Fe<sub>5</sub>S<sub>8</sub>-900 and P-NSC/Ni<sub>4</sub>Fe<sub>5</sub>S<sub>8</sub>-1100.

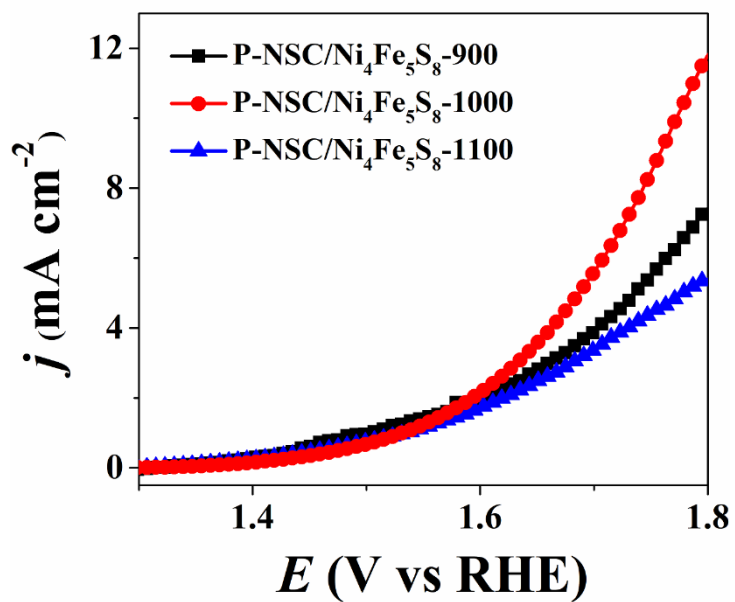

**Figure S23** Steady-state polarization curves of P-NSC/Ni<sub>4</sub>Fe<sub>5</sub>S<sub>8</sub>-900, P-NSC/Ni<sub>4</sub>Fe<sub>5</sub>S<sub>8</sub>-1000, and P-NSC/Ni<sub>4</sub>Fe<sub>5</sub>S<sub>8</sub>-1100 for OER in 0.5 M H<sub>2</sub>SO<sub>4</sub>.



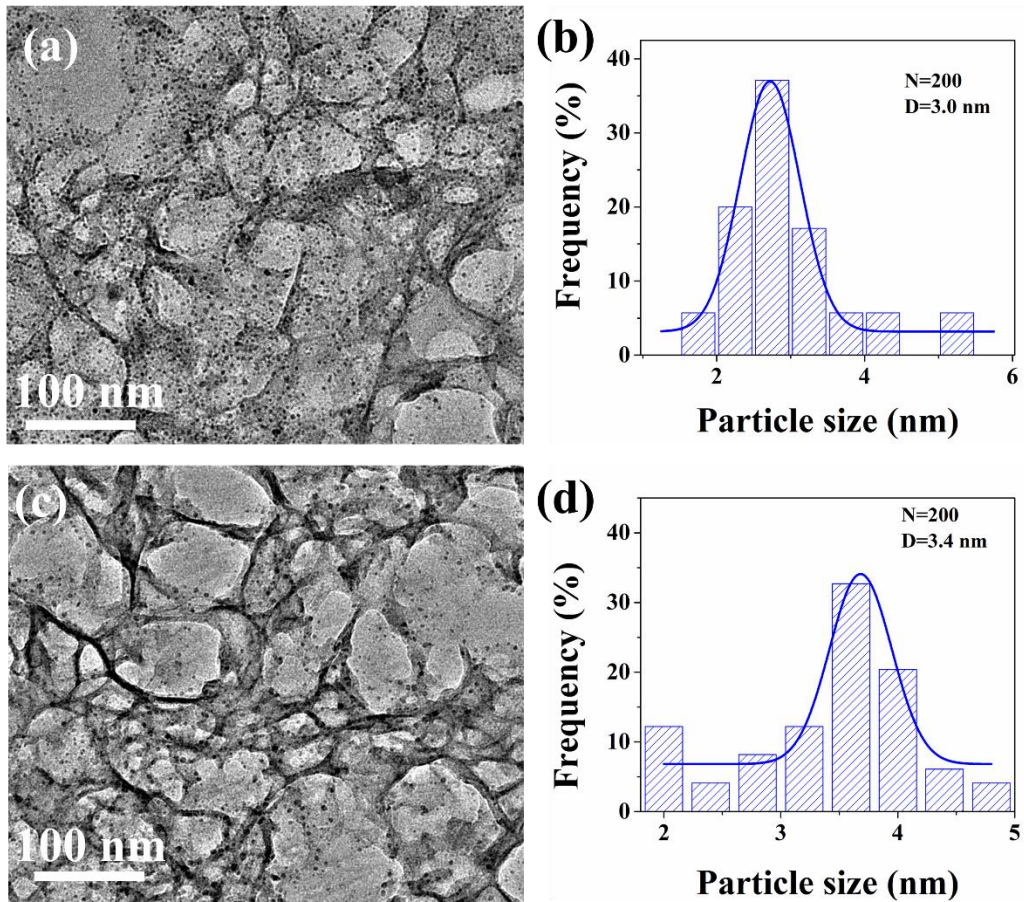

**Figure S24** (a) TEM images of P-NSC/Ni<sub>4</sub>Fe<sub>5</sub>S<sub>8</sub>-900, (b) corresponding size distribution of Ni<sub>4</sub>Fe<sub>5</sub>S<sub>8</sub> nanoparticles based on (a); (c) TEM images of P-NSC/Ni<sub>4</sub>Fe<sub>5</sub>S<sub>8</sub>-1100, (d) corresponding size distribution of Ni<sub>4</sub>Fe<sub>5</sub>S<sub>8</sub> nanoparticles based on (c).

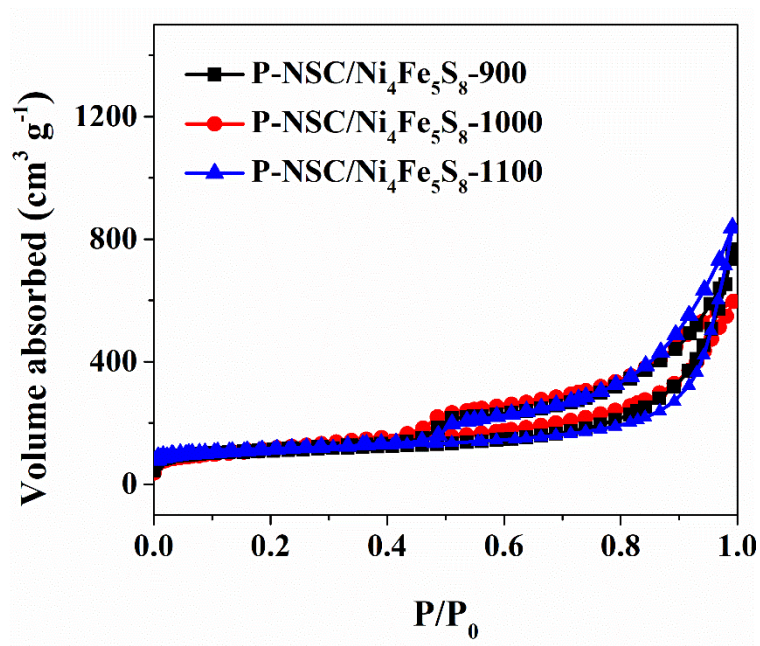

**Figure S25**  $\text{N}_2$  adsorption-desorption isotherms of P-NSC/ $\text{Ni}_4\text{Fe}_5\text{S}_8$ -900, P-NSC/ $\text{Ni}_4\text{Fe}_5\text{S}_8$ -1000, and P-NSC/ $\text{Ni}_4\text{Fe}_5\text{S}_8$ -1100 at 77 K.

To further examine the important role of pyridinic-N, S doped carbon for acid OER, we also prepared P-NSC/ $\text{Ni}_4\text{Fe}_5\text{S}_8$ -900 and P-NSC/ $\text{Ni}_4\text{Fe}_5\text{S}_8$ -1100 (900 and 1100 refer to the pyrolysis temperature) (see Experiment Section). With the pyrolysis temperature increase from 900 to 1100 °C, the N contents decreased sharply from 2.67 to 1.08 at%, accompanying with the ratio of pyridinic-N to sum N decreasing from 0.37 to 0.30. (Figure S20-21, and Table S1). This means that there are much more pyridinic-N species on the P-NSC/ $\text{Ni}_4\text{Fe}_5\text{S}_8$ -900, compared with that of P-NSC/ $\text{Ni}_4\text{Fe}_5\text{S}_8$ -900. Furthermore, the content of S elements in the P-NSC/ $\text{Ni}_4\text{Fe}_5\text{S}_8$ -900 is 5.00 at%, higher than that on the P-NSC/ $\text{Ni}_4\text{Fe}_5\text{S}_8$ -1100 (3.58 at%). Given the high content of pyridinic N and S species in the P-NSC/ $\text{Ni}_4\text{Fe}_5\text{S}_8$ -900, it can be concluded that there are more

pyridinic-N, S-doped carbon in the P-NSC/Ni<sub>4</sub>Fe<sub>5</sub>S<sub>8</sub>-900 than that in the P-NSC/Ni<sub>4</sub>Fe<sub>5</sub>S<sub>8</sub>-1100. The OER performance of P-NSC/Ni<sub>4</sub>Fe<sub>5</sub>S<sub>8</sub>-900 and P-NSC/Ni<sub>4</sub>Fe<sub>5</sub>S<sub>8</sub>-1100 was then tested in 0.5 M H<sub>2</sub>SO<sub>4</sub>. (Figure S22) With the higher pyridinic-N, S-doped carbon contents, the P-NSC/Ni<sub>4</sub>Fe<sub>5</sub>S<sub>8</sub>-900 displayed higher OER activity than that of P-NSC/Ni<sub>4</sub>Fe<sub>5</sub>S<sub>8</sub>-1100, suggesting the essential role of pyridinic-N, S-doped carbon for OER. Nevertheless, the OER activity of P-NSC/Ni<sub>4</sub>Fe<sub>5</sub>S<sub>8</sub>-900 is still lower than that of P-NSC/Ni<sub>4</sub>Fe<sub>5</sub>S<sub>8</sub>-1000, further confirming the high activity of P-NSC/Ni<sub>4</sub>Fe<sub>5</sub>S<sub>8</sub>-1000 for OER.

On the other hand, as displayed in Figure S24, the Ni<sub>4</sub>Fe<sub>5</sub>S<sub>8</sub> nanoparticles in all of the P-NSC/Ni<sub>4</sub>Fe<sub>5</sub>S<sub>8</sub> samples (i.e. P-NSC/Ni<sub>4</sub>Fe<sub>5</sub>S<sub>8</sub>-900, P-NSC/Ni<sub>4</sub>Fe<sub>5</sub>S<sub>8</sub>-1000, and P-NSC/Ni<sub>4</sub>Fe<sub>5</sub>S<sub>8</sub>-1100) were in size of ~3.0 nm, indicating that the pyrolysis temperature had little impact on the size of resulting Ni<sub>4</sub>Fe<sub>5</sub>S<sub>8</sub> nanoparticles. Moreover, the P-NSC/Ni<sub>4</sub>Fe<sub>5</sub>S<sub>8</sub>-900, and P-NSC/Ni<sub>4</sub>Fe<sub>5</sub>S<sub>8</sub>-1100 displayed the similar isotherm curves as that of P-NSC/Ni<sub>4</sub>Fe<sub>5</sub>S<sub>8</sub>-1000. (Figure S25) And, all the P-NSC/Ni<sub>4</sub>Fe<sub>5</sub>S<sub>8</sub>-900, P-NSC/Ni<sub>4</sub>Fe<sub>5</sub>S<sub>8</sub>-1000, and P-NSC/Ni<sub>4</sub>Fe<sub>5</sub>S<sub>8</sub>-1100 possessed nearly the same BET surface area of ~400 cm<sup>2</sup> g<sup>-1</sup>. Therefore, the different acid OER performance demonstrated on P-NSC/Ni<sub>4</sub>Fe<sub>5</sub>S<sub>8</sub>-900, P-NSC/Ni<sub>4</sub>Fe<sub>5</sub>S<sub>8</sub>-1000, and P-NSC/Ni<sub>4</sub>Fe<sub>5</sub>S<sub>8</sub>-1100 may not be related to the particle size of Ni<sub>4</sub>Fe<sub>5</sub>S<sub>8</sub> and surface area. In other words, the different OER performance is solely resulted from the different content of pyridinic-N, S-doped carbon.

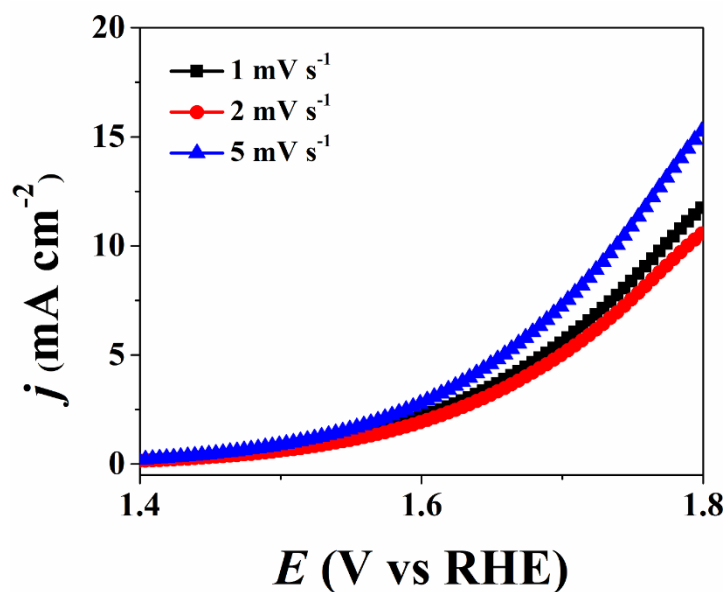

**Figure S26** Steady-state polarization profiles of P-NSC/Ni<sub>4</sub>Fe<sub>5</sub>S<sub>8</sub>-1000 for OER at different scan rates in 0.5 M H<sub>2</sub>SO<sub>4</sub>.

To investigate the mass transport of acid OER process, the polarization profiles of P-NSC/Ni<sub>4</sub>Fe<sub>5</sub>S<sub>8</sub>-1000 for OER at different scan rates (i.e. 1, 2, 5 mV s<sup>-1</sup>) were recorded. (Figure S26) With the scan rates increasing from 1 to 5 mV s<sup>-1</sup>, only tiny change of polarization curves can be observed on P-NSC/Ni<sub>4</sub>Fe<sub>5</sub>S<sub>8</sub>-1000 electrocatalyst, implying the fast mass transport during OER.<sup>[1]</sup>

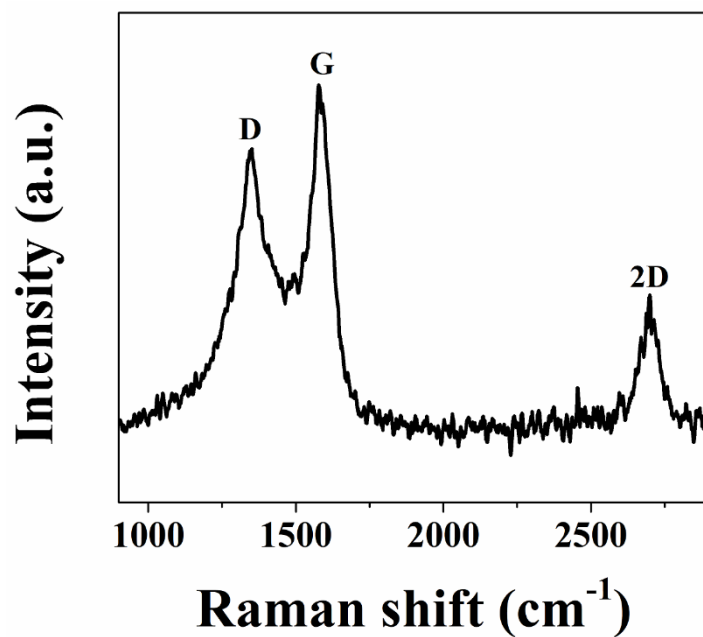

**Figure S27** Raman spectrum of P-NSC/Ni<sub>4</sub>Fe<sub>5</sub>S<sub>8</sub>-1000 electrocatalyst.

As shown in Figure S27, the Raman spectrum of P-NSC/Ni<sub>4</sub>Fe<sub>5</sub>S<sub>8</sub>-1000 electrocatalyst displayed two main peaks at 1348 and 1574 cm<sup>-1</sup>, corresponding to the D and G band of carbon, respectively.<sup>[2]</sup> The relative low intensity ratio of I<sub>D</sub>/I<sub>G</sub> (0.81) and the obvious 2D peak (2700 cm<sup>-1</sup>) of carbon signified the carbon network on the P-NSC/Ni<sub>4</sub>Fe<sub>5</sub>S<sub>8</sub>-1000 electrocatalyst possessed high graphitization.<sup>[3]</sup>

## References

- [1] F. Song, X. Hu, *J. Am. Chem. Soc.*, **2014**, 136, 16481–16484.
- [2] Q. Wang, Y. Ji, Y. Lei, Y. Wang, Y. Wang, Y. Li, S. Wang, *ACS Energy Lett.*, **2018**, 3, 1183–1191.
- [3] A. C. Ferrari, J. C. Meyer, V. Scardaci, C. Casiraghi, M. Lazzeri, Mauri, F.; S. Piscanec, D. Jiang, K. S. Novoselov, S. Roth, A. K. Geim, *Phys. Rev. Lett.* **2006**, 97, 187401.
